# Supplementary material
Source: Springer Nature journal article supplement (https://www.springermedizin.de/resource/supplementary/12967_2011_765_MOESM1_ESM.pdf/9577008)

**A)**

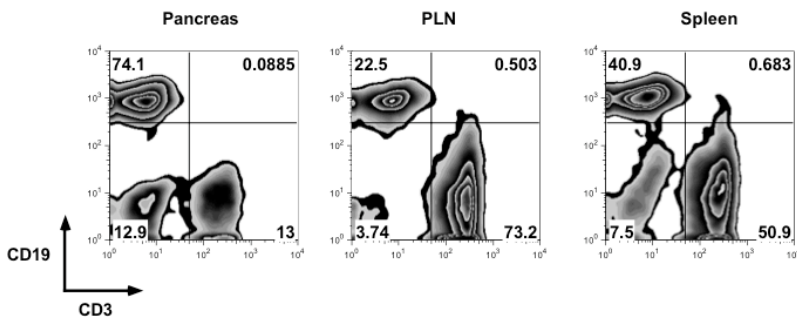

**B)**

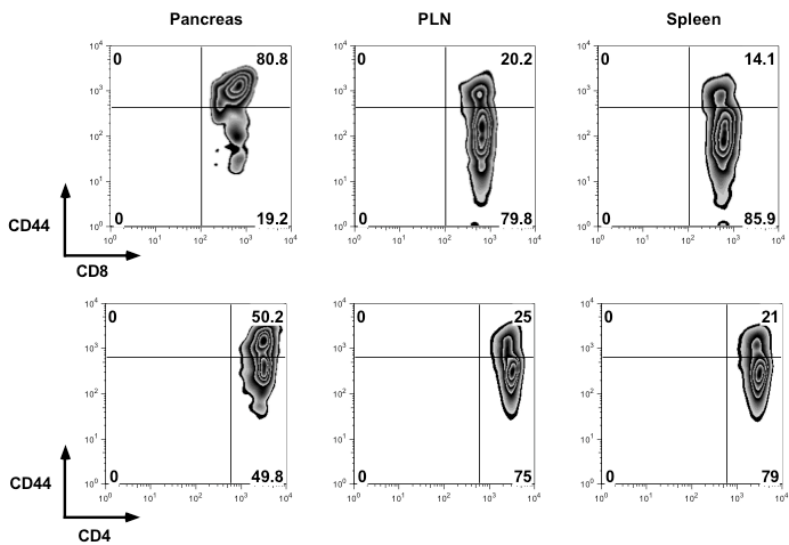

**C)**

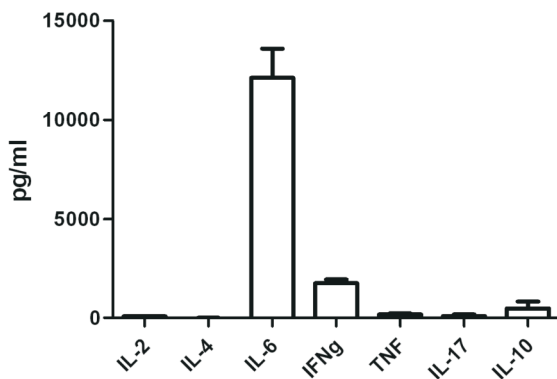

Supplement: MOESM1 [file 9577008]
